# Supplementary material for: β-Blockers in sepsis: protocol for a systematic review and meta-analysis of randomised control trials
Source: PubMed Central journal article supplement — BMJ Open. 2016 Jun 23;6(6):e012466. doi: 10.1136/bmjopen-2016-012466 (PMC4932247; doi:10.1136/bmjopen-2016-012466), 2016-06-23
Supplement: bmjopen-2016-012466supp_appendices.pdf [file bmjopen-2016-012466supp_appendices.pdf]

## APPENDICES

### Appendix 1: Search strategy for MEDLINE In-Process & Other Non-Indexed Citations (1946 to Present)

| #  | Searches                                                                                  |
|----|-------------------------------------------------------------------------------------------|
| 1  | adrenergic beta-antagonists.mp. or exp Adrenergic beta-Antagonists/                       |
| 2  | alprenolol.mp. or exp Alprenolol/                                                         |
| 3  | bunolol.mp.                                                                               |
| 4  | bupranolol.mp. or exp Bupranolol/                                                         |
| 5  | carteolol.mp. or exp Carteolol/                                                           |
| 6  | dihydroalprenolol.mp. or exp Dihydroalprenolol/                                           |
| 7  | iodocyanopindolol.mp. or exp Iodocyanopindolol/                                           |
| 8  | labetalol.mp. or exp Labetalol/                                                           |
| 9  | levobunolol.mp. or exp Levobunolol/                                                       |
| 10 | metipranolol.mp. or exp Metipranolol/                                                     |
| 11 | nadolol.mp. or exp Nadolol/                                                               |
| 12 | oxprenolol.mp. or exp Oxprenolol/                                                         |
| 13 | penbutolol.mp. or exp Penbutolol/                                                         |
| 14 | pindolol.mp. or exp Pindolol/                                                             |
| 15 | propranolol.mp. or exp Propranolol/                                                       |
| 16 | sotalol.mp. or exp Sotalol/                                                               |
| 17 | exp Timolol/ or timolol.mp.                                                               |
| 18 | adrenergic beta-1 receptor antagonists.mp. or exp Adrenergic beta-1 Receptor Antagonists/ |

|    |                                                                                                                                                                               |
|----|-------------------------------------------------------------------------------------------------------------------------------------------------------------------------------|
| 19 | acebutolol.mp. or exp Acebutolol/                                                                                                                                             |
| 20 | atenolol.mp. or exp Atenolol/                                                                                                                                                 |
| 21 | betaxolol.mp. or exp Betaxolol/                                                                                                                                               |
| 22 | bisoprolol.mp. or exp Bisoprolol/                                                                                                                                             |
| 23 | exp Celiprolol/ or celiprolol.mp.                                                                                                                                             |
| 24 | metoprolol.mp. or exp Metoprolol/                                                                                                                                             |
| 25 | practolol.mp. or exp Practolol/                                                                                                                                               |
| 26 | beta-blockers.mp.                                                                                                                                                             |
| 27 | esmolol.mp.                                                                                                                                                                   |
| 28 | Bucindolol.mp.                                                                                                                                                                |
| 29 | Carvedilol.mp.                                                                                                                                                                |
| 30 | Nebivolol.mp. or exp Nebivolol/                                                                                                                                               |
| 31 | sepsis.mp. or exp Sepsis/                                                                                                                                                     |
| 32 | septic shock.mp. or exp Shock, Septic/                                                                                                                                        |
| 33 | septicemia.mp.                                                                                                                                                                |
| 34 | severe sepsis.mp.                                                                                                                                                             |
| 35 | 1 or 2 or 3 or 4 or 5 or 6 or 7 or 8 or 9 or 10 or 11 or 12 or 13 or 14<br>or 15 or 16 or 17 or 18 or 19 or 20 or 21 or 22 or 23 or 24 or 25 or 26<br>or 27 or 28 or 29 or 30 |
| 36 | 31 or 32 or 33 or 34                                                                                                                                                          |
| 37 | 35 and 36                                                                                                                                                                     |

**Appendix 2: A priori hypotheses for subgroup effects**

| <b>Subgroup</b>                             | <b>a priori hypotheses of subgroup effect by outcome</b>                 |                                                             |                                                             |                                                             |                                                             |                                                            |
|---------------------------------------------|--------------------------------------------------------------------------|-------------------------------------------------------------|-------------------------------------------------------------|-------------------------------------------------------------|-------------------------------------------------------------|------------------------------------------------------------|
|                                             | <b>Mortality</b>                                                         | <b>Lengths of ICU and hospital stay</b>                     | <b>Heart Rate</b>                                           | <b>Mean arterial pressure</b>                               | <b>Cardiac index</b>                                        | <b>Vasopressor dose</b>                                    |
| <b>Patients</b>                             |                                                                          |                                                             |                                                             |                                                             |                                                             |                                                            |
| Sepsis vs severe sepsis vs septic shock     | Greater reduction with beta-blockade in more severe illness              | Greater reduction with beta-blockade in more severe illness | Greater reduction with beta-blockade in more severe illness | Greater reduction with beta-blockade in more severe illness | Greater reduction with beta-blockade in more severe illness | Greater increase with beta-blockade in more severe illness |
| <b>Intervention</b>                         |                                                                          |                                                             |                                                             |                                                             |                                                             |                                                            |
| esmolol vs other beta blockers              | Greater reduction with beta-blockade in esmolol                          | Greater reduction with beta-blockade in esmolol             | Greater reduction with beta-blockade in esmolol             | Greater reduction with beta-blockade in esmolol             | Smaller reduction with beta-blockade in esmolol             | Smaller increase with beta-blockade in esmolol             |
| <b>Methodology</b>                          |                                                                          |                                                             |                                                             |                                                             |                                                             |                                                            |
| high or unclear vs low risk of bias studies | Greater treatment effect with beta-blockade in high risk of bias studies |                                                             |                                                             |                                                             |                                                             |                                                            |

### Appendix 3. PRISMA-P 2015 checklist

---

| Section and topic                 | Item No | Location in systematic review protocol                                                             |
|-----------------------------------|---------|----------------------------------------------------------------------------------------------------|
| <b>ADMINISTRATIVE INFORMATION</b> |         |                                                                                                    |
| Title:                            |         |                                                                                                    |
| Identification                    | 1a      | Title                                                                                              |
| Update                            | 1b      | Title                                                                                              |
| Registration                      | 2       | Review registration                                                                                |
| Authors:                          |         |                                                                                                    |
| Contact                           | 3a      | Authors                                                                                            |
| Contributions                     | 3b      | Contributions                                                                                      |
| Amendments                        | 4       | N/A                                                                                                |
| Support:                          |         |                                                                                                    |
| Sources                           | 5a      | Funding                                                                                            |
| Sponsor                           | 5b      | N/A                                                                                                |
| Role of sponsor                   | 5c      | N/A                                                                                                |
| <b>INTRODUCTION</b>               |         |                                                                                                    |
| Rationale                         | 6       | Introduction                                                                                       |
| Objectives                        | 7       | Introduction                                                                                       |
| <b>METHODS</b>                    |         |                                                                                                    |
| Eligibility criteria              | 8       | Methods: Criteria for selecting studies for this review                                            |
| Information sources               | 9       | Methods: Search methods for identification of studies, Additional search methods (grey literature) |
| Search strategy                   | 10      | Appendix 1                                                                                         |
| Study records:                    |         |                                                                                                    |
| Data management                   | 11a     | Methods: Trial records, Data collection                                                            |
| Selection process                 | 11b     | Methods: Trial records                                                                             |
| Data collection process           | 11c     | Methods: Data collection                                                                           |
| Data items                        | 12      | Methods: Types of outcomes, Data collection, Summarizing data and treatment effect                 |

|                                    |                                                                                                                                                                                                                                                                  |
|------------------------------------|------------------------------------------------------------------------------------------------------------------------------------------------------------------------------------------------------------------------------------------------------------------|
| Outcomes and prioritization        | 13 Methods: Types of outcomes                                                                                                                                                                                                                                    |
| Risk of bias in individual studies | 14 Methods: Assessment of risk of bias                                                                                                                                                                                                                           |
| Data synthesis                     | 15a Methods: Summarizing data and treatment effect<br>15b Methods: Summarizing data and treatment effect, Assessment of heterogeneity<br>15c Methods: Subgroup analysis and investigation of heterogeneity<br>15d Methods: Summarizing data and treatment effect |
| Meta-bias(es)                      | 16 Methods: Assessment of reporting bias                                                                                                                                                                                                                         |
| Confidence in cumulative evidence  | 17 Methods: Assessment of confidence in estimates of effect                                                                                                                                                                                                      |
